# Supplementary material
Source: PubMed Central journal article supplement (PMC3074011)
Supplement: NIHMS257569-supplement-1_si_001.pdf [file NIHMS257569-supplement-1_si_001.pdf]

Kinetic and Chemical Mechanism of the Dihydrofolate Reductase from *Mycobacterium tuberculosis*

Clarissa M. Czekster<sup>‡</sup>, An Vandemeulebroucke<sup>‡</sup>, John S. Blanchard<sup>‡\*</sup>

<sup>‡</sup> Department of Biochemistry, Albert Einstein College of Medicine, 1300 Morris Park Avenue, Bronx, New York 10461.

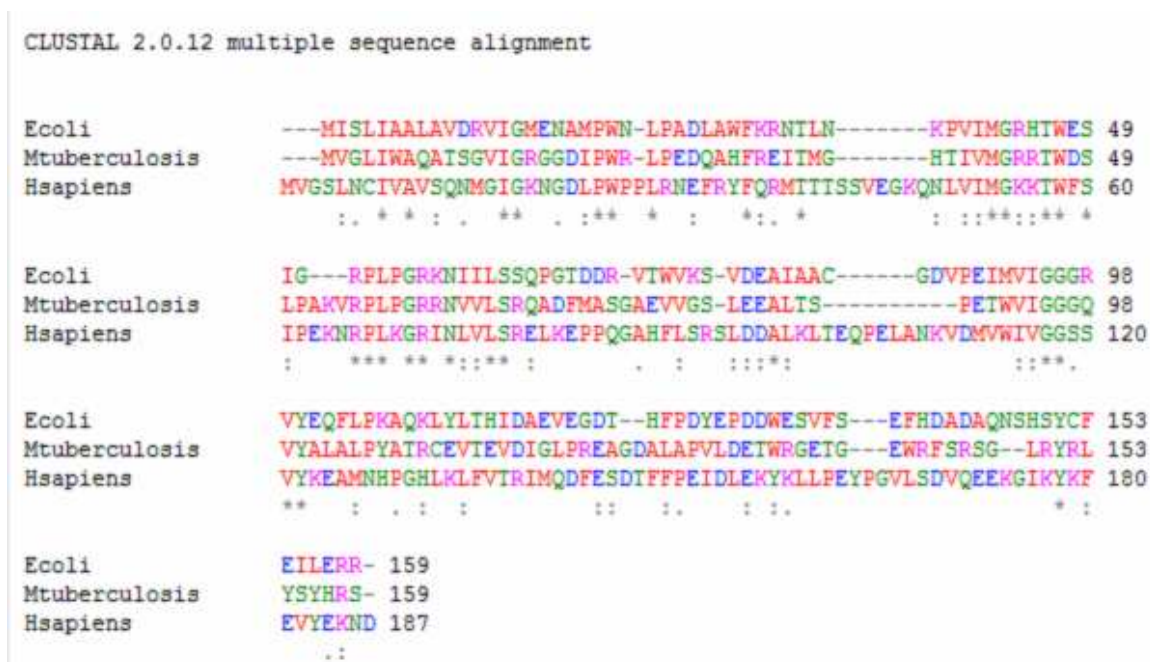

Supplementary Figure 1: Primary sequence alignment of the *Mt*DHFR, *Ec*DHFR, and *Hs*DHFR.

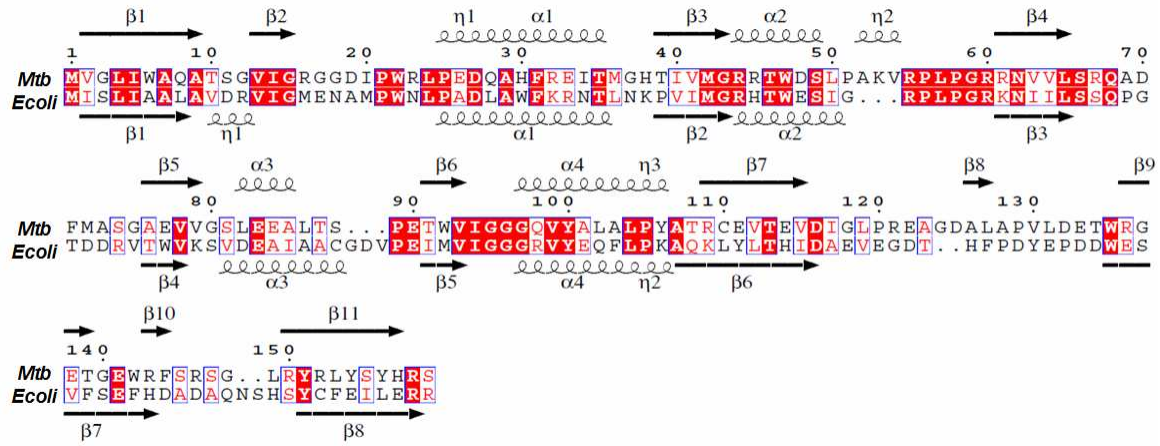

Supplementary Figure 2: Structure-based sequence alignment of the *MtDHFR* and *EcDHFR* made using ESPrpt.

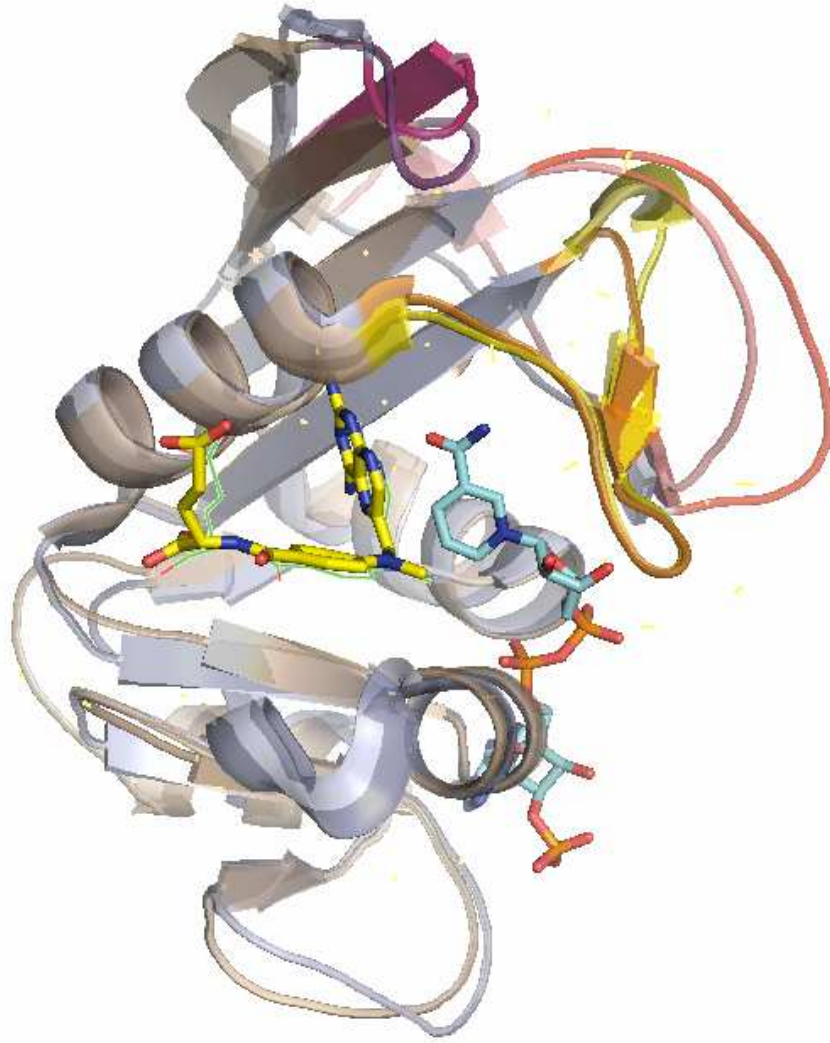

Supplementary Figure 3: Structure alignment of the *Mt*DHFR (blue), and the *Ec*DHFR (light orange). The main differences between the two proteins are in the M20 loop (orange in the *Mt*DHFR, yellow in the *Ec*DHFR), the F/G loop (pink in the *Mt*DHFR, light pink in the *Ec*DHFR), and the G/H loop (light purple in the *Mt*DHFR, dark purple in the *Ec*DHFR). NADPH is shown in blue/orange, methotrexate is shown in yellow.
